# Supplementary material for: A sol–gel synthesis to prepare size and shape-controlled mesoporous nanostructures of binary (II–VI) metal oxides
Source: Royal Society of Chemistry journal article supplement (doi:10.1039/d0ra01778g), 2020-01-01
Supplement: d0ra01778g1.pdf [file d0ra01778g1.pdf]

Supporting Information

# Sol-Gel Synthesis for Size and Shape-Controlled Metal Oxide Nanostructures

Hemali Rathnayake<sup>a,\*</sup>, Rayan Yarbrough<sup>a</sup>, Klinton Davis<sup>a</sup>, and Sheeba Dawood<sup>a</sup>

<sup>a</sup>Department of Nanoscience, Joint School of Nanoscience and Nanoengineering,  
University of North Carolina at Greensboro, Greensboro NC 27401

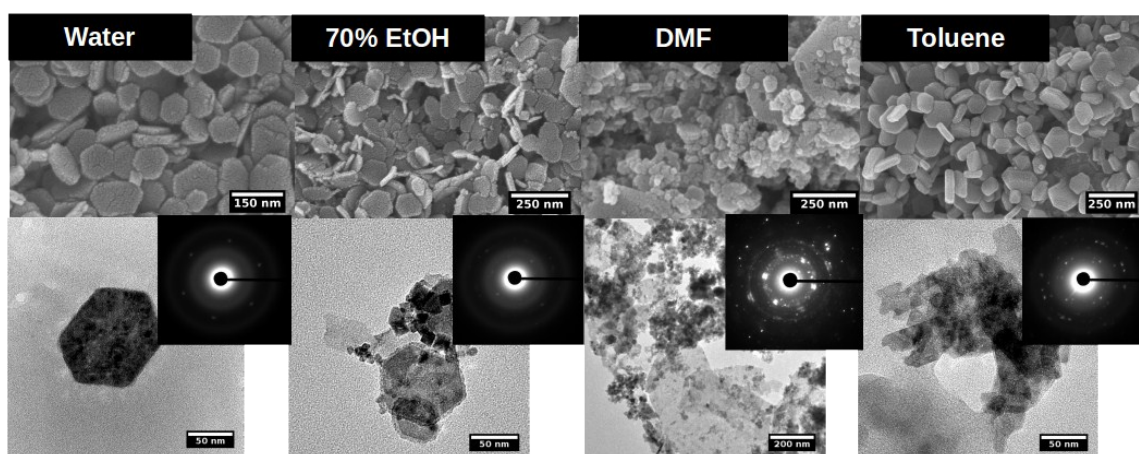

Figure S1: Mn<sub>3</sub>O<sub>4</sub> SEM (top), TEM (down) and SAED pattern of manganese oxide nanostructures formed in each different solvent system at the molar ratio of precursor to base 1:10.

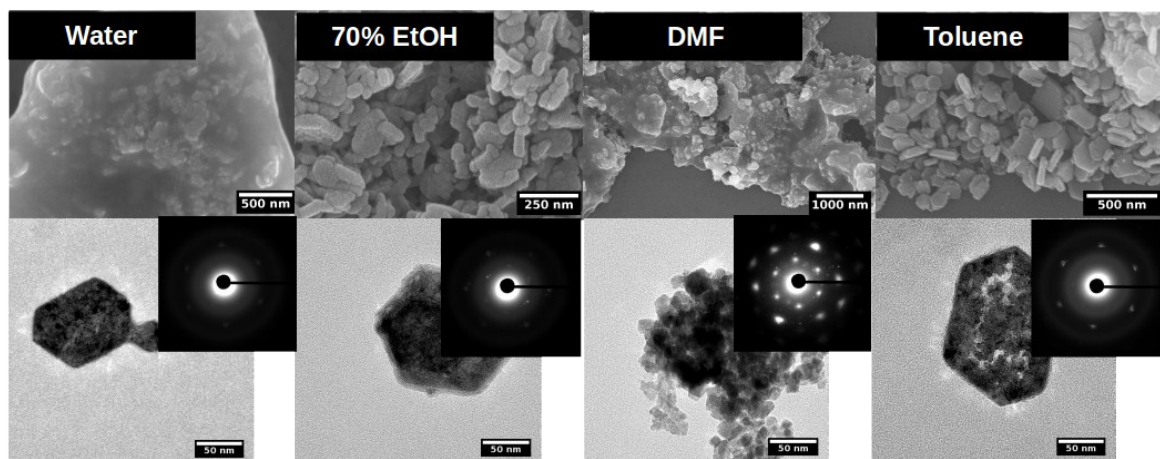

Figure S2: Mn<sub>3</sub>O<sub>4</sub> SEM (top), TEM (down) and SAED pattern of manganese oxide nanostructures formed in each different solvent system at the molar ratio of precursor to base 1:15.

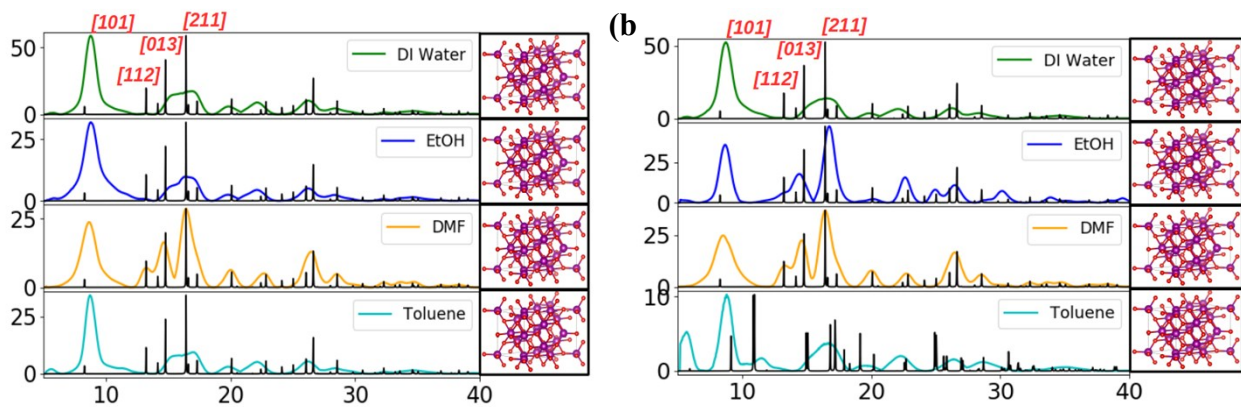

Figure S3:  $Mn_3O_4$  XRD pattern of manganese oxide nanostructures formed in each solvent system at a molar ratio of precursor to base of: (a) 1:10, and (b) 1:15 with the unit cell structure – triclinic.

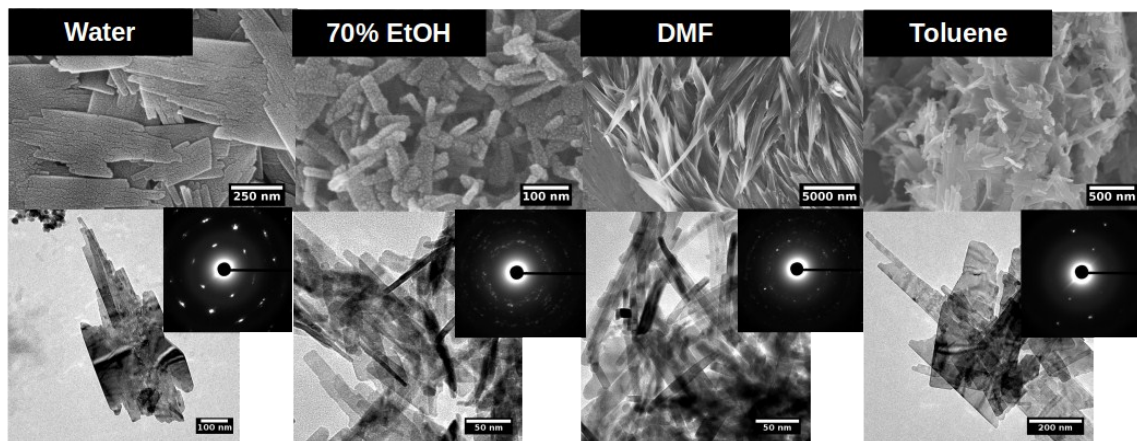

Figure S4:  $CuO$  SEM (top), TEM (down) and SAED pattern of copper oxide nanostructures formed in each different solvent system at the molar ratio of precursor to base 1:10.

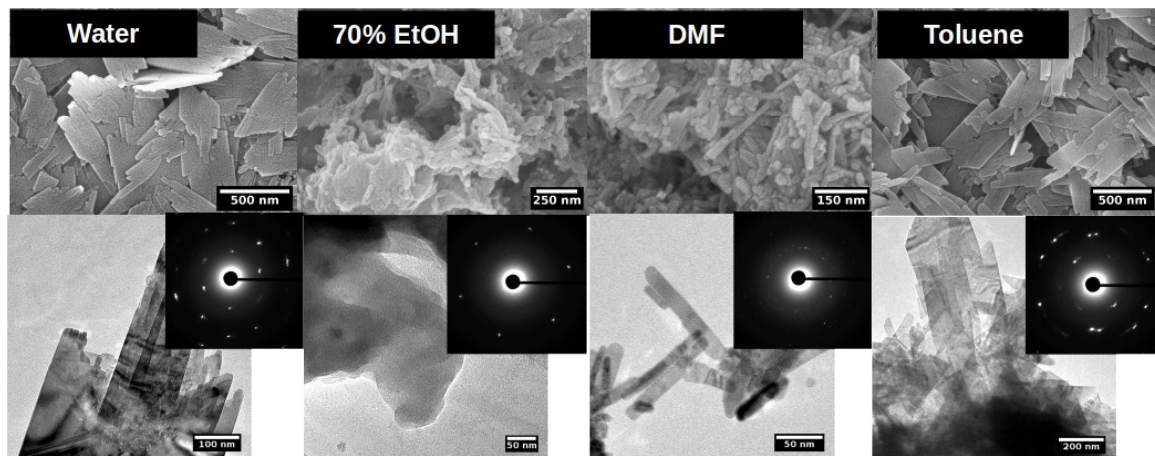

Figure S5: CuO SEM (top), TEM (down) and SAED pattern of copper oxide nanostructures formed in each different solvent system at the molar ratio of precursor to base 1:15.

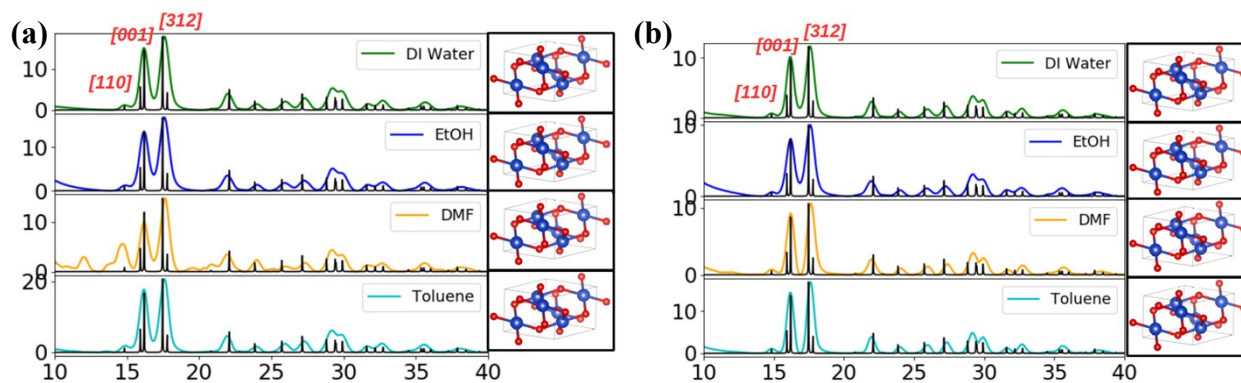

Figure S6: CuO XRD pattern of copper oxide nanostructures formed in each solvent system at a molar ratio of precursor to base of: (a) 1:10, and (b) 1:15 with the unit cell structure - Monoclinic.



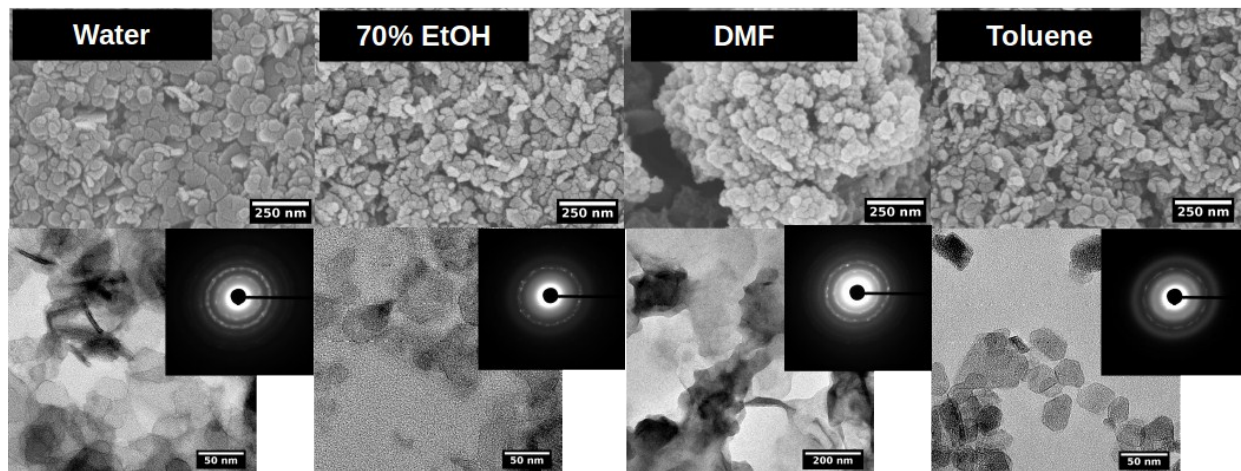

Figure S7:  $\text{Mg}(\text{OH})_2$  SEM (top), TEM (down) and SAED pattern of magnesium hydroxide nanostructures formed in each different solvent system at the molar ratio of precursor to base 1:10.

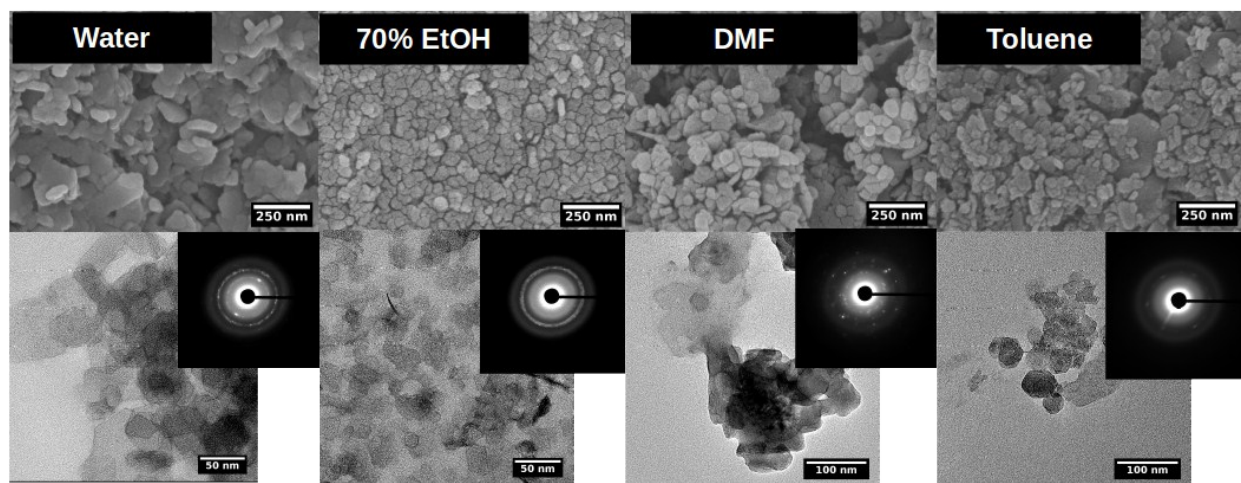

Figure S8:  $\text{Mg}(\text{OH})_2$  SEM (top), TEM (down) and SAED pattern of magnesium hydroxide nanostructures formed in each different solvent system at the molar ratio of precursor to base 1:15.

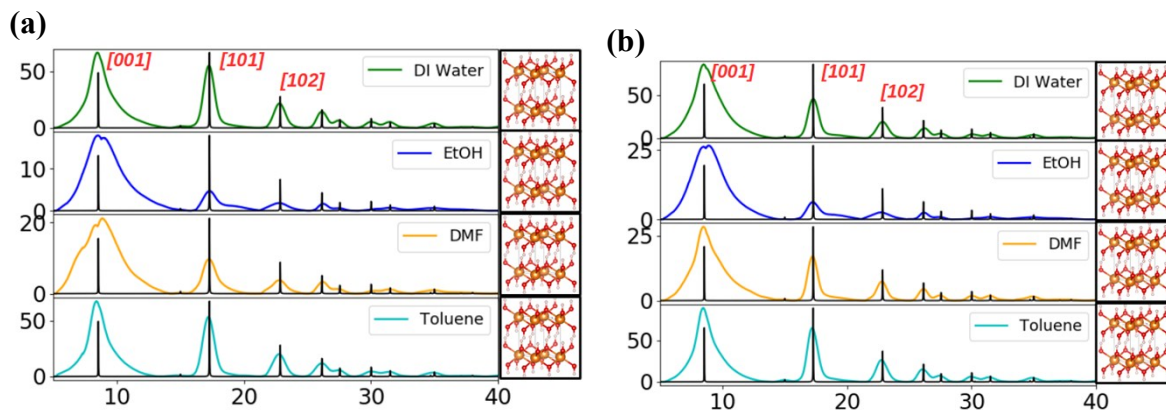

Figure S9:  $\text{Mg}(\text{OH})_2$  XRD pattern of magnesium hydroxide nanostructures formed in each solvent system at a molar ratio of precursor to base of: (a) 1:10, and (b) 1:15 with the unit cell structure - trigonal.

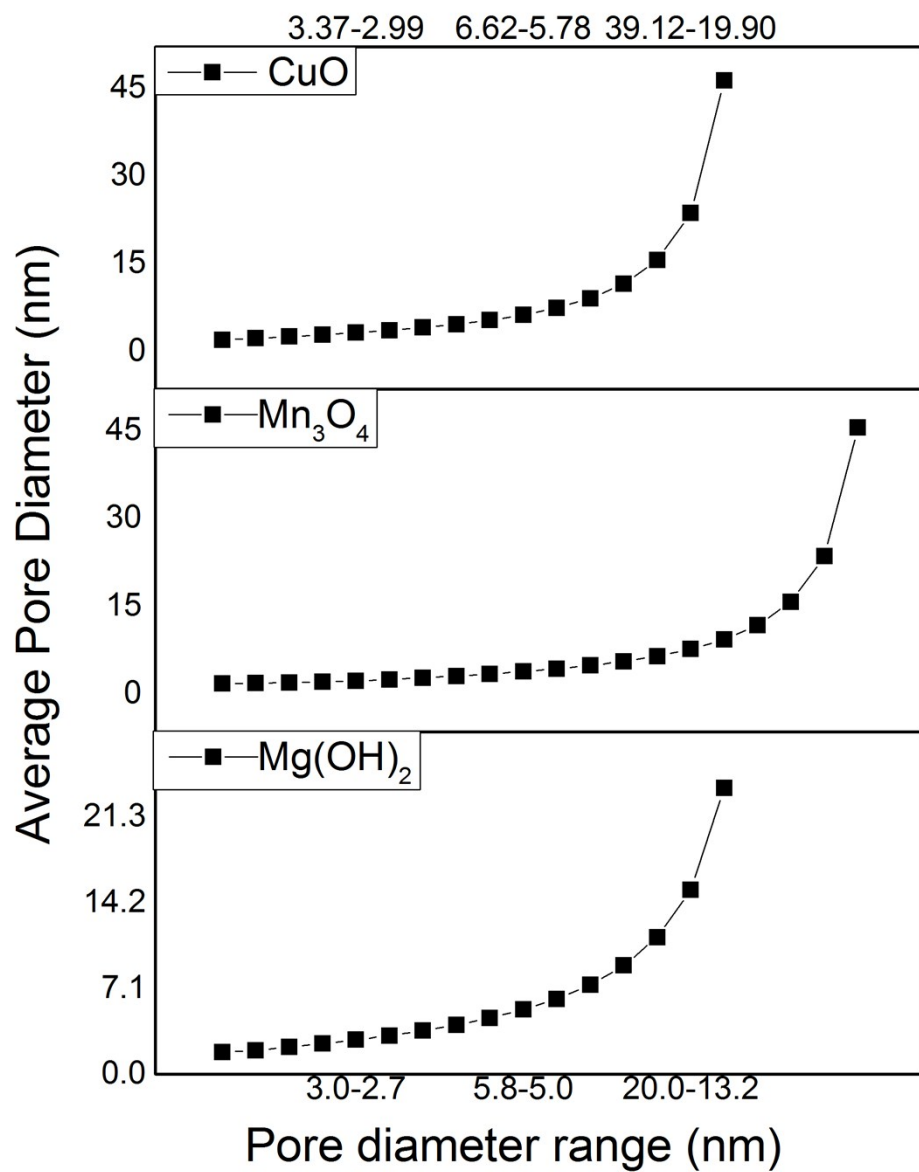

Figure S10: BJH desorption average pore diameter distribution graphs of Mn<sub>3</sub>O<sub>4</sub>, CuO, and Mg(OH)<sub>2</sub> nanostructures prepared at 1:10 molar ratio of the precursor to the base concentration in water and toluene respectively.

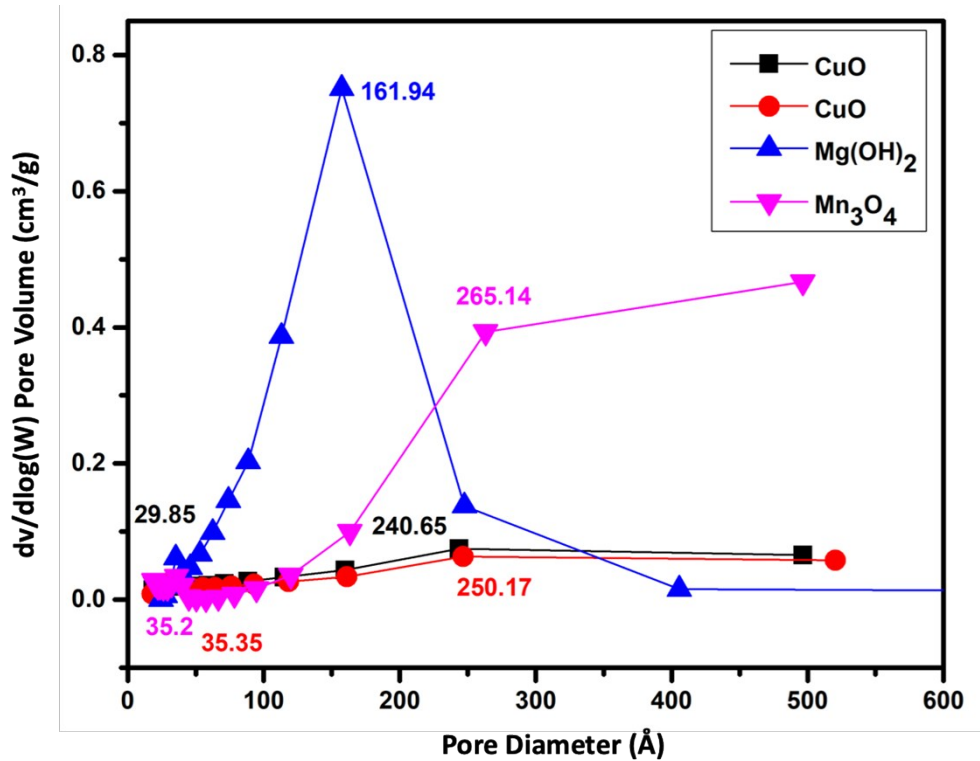

Figure S11: The comparison graph of BJH desorption pore volume distribution with respect to average pore diameter of Mn<sub>3</sub>O<sub>4</sub>, CuO, and Mg(OH)<sub>2</sub> nanostructures prepared at 1:10 molar ratio of the precursor to the base concentration in water and water/toluene respectively.
